# Supplementary material for: Die Dialectical Behavior Therapy Ways of Coping Checklist (DBT-WCCL)
Source: Atypon-hosted journal article supplement (doi:10.1026/0012-1924/a000164), 2016-05-12
Supplement: 0012_1924_a000164_esm1.pdf [file 0012_1924_a000164_esm1.pdf]

## ESM I. Deskriptive Kennwerte und standardisierte Faktorladungen (FL)

| Nr.                                        | Item                                                                                                                               | M (SD)      | FL   |
|--------------------------------------------|------------------------------------------------------------------------------------------------------------------------------------|-------------|------|
| <b>Faktor 1: DBT-Skillsanwendung (DSS)</b> |                                                                                                                                    |             |      |
| 02.                                        | habe ich jemandem davon erzählt, wie ich mich fühlte.                                                                              | 2.01 (1.06) | 0.55 |
| 04.                                        | habe ich für meinen Körper und meine Gesundheit gesorgt um emotional weniger anfällig zu sein.                                     | 1.43 (1.08) | 0.57 |
| 06.                                        | habe ich mich bemüht, kurz innezuhalten und meine Gedanken zu ordnen bevor ich handelte.                                           | 1.62 (1.03) | 0.72 |
| 08.                                        | habe ich mir gesagt, dass es auch noch schlimmer sein könnte.                                                                      | 1.47 (1.10) | 0.45 |
| 09.                                        | habe ich versucht, mich durch Aktivitäten abzulenken.                                                                              | 2.37 (1.08) | 0.43 |
| 11.                                        | habe ich mich mit einem Kompromiss zufrieden gegeben.                                                                              | 1.59 (1.01) | 0.54 |
| 12.                                        | habe ich versucht, die Anzahl angenehmer Dinge in meinem Alltag zu erhöhen um häufiger positive Gefühle zu erleben.                | 1.56 (0.99) | 0.76 |
| 14.                                        | habe ich mir selbst gesagt, wie viel ich schon erreicht habe.                                                                      | 1.15 (0.99) | 0.69 |
| 15.                                        | habe ich meine starken Gefühle akzeptiert, aber nicht zugelassen, dass sie andere Dinge zu sehr behinderten oder beeinträchtigten. | 1.43 (1.08) | 0.58 |
| 17.                                        | habe ich mir eine Reihe verschiedener Lösungen für mein Problem einfallen lassen.                                                  | 1.49 (1.06) | 0.76 |
| 19.                                        | war ich dankbar, für das was ich habe.                                                                                             | 1.48 (1.12) | 0.54 |
| 20.                                        | habe ich etwas an mit selbst verändert, so dass ich mit der Situation besser umgehen konnte.                                       | 1.57 (1.06) | 0.67 |
| 22.                                        | habe ich mich mit etwas verwöhnt, dass sich gut anfühlte (z.B. ein Schaumbad oder eine Umarmung).                                  | 1.59 (1.15) | 0.54 |
| 24.                                        | habe ich mich so verhalten, dass ich mir danach noch selbst in die Augen schauen konnte.                                           | 1.96 (1.07) | 0.48 |
| 26.                                        | bin ich die Dinge Schritt für Schritt angegangen.                                                                                  | 1.45 (1.08) | 0.81 |
| 29.                                        | habe ich mit jemandem gesprochen, der konkret etwas am Problem verändern konnte.                                                   | 1.67 (1.05) | 0.63 |
| 30.                                        | habe ich mir vor Augen geführt, wie viel besser es mir im Vergleich zu manch anderem geht.                                         | 1.36 (1.06) | 0.34 |

|                                                             |                                                                                                                                                  |             |      |
|-------------------------------------------------------------|--------------------------------------------------------------------------------------------------------------------------------------------------|-------------|------|
| 34.                                                         | habe ich erkannt, was zu tun war, so dass ich meine Anstrengungen verdoppelte und mich noch mehr bemühte, die Situation erfolgreich zu meistern. | 1.79 (1.11) | 0.53 |
| 35.                                                         | habe ich mir einen Plan gemacht und diesen befolgt.                                                                                              | 1.48 (1.03) | 0.74 |
| 37.                                                         | habe ich etwas getan, um ein anderes Gefühl zu bekommen (z.B. einen lustigen Film angeschaut).                                                   | 1.94 (1.04) | 0.61 |
| 39.                                                         | habe ich mich auf die guten Dinge in meinem Leben konzentriert.                                                                                  | 1.33 (1.03) | 0.77 |
| 41.                                                         | habe ich mich mit etwas anderem abgelenkt.                                                                                                       | 2.35 (1.02) | 0.39 |
| 42.                                                         | habe ich versucht, nicht zu überstürzt zu handeln und nicht meinem ersten Impuls nachzugehen.                                                    | 1.76 (1.11) | 0.63 |
| 45.                                                         | habe ich etwas so verändert, dass die Dinge am Ende gut ausgingen.                                                                               | 1.56 (0.94) | 0.73 |
| 46.                                                         | suchte ich mir etwas Schönes zum Anschauen, um mich besser zu fühlen.                                                                            | 1.35 (1.14) | 0.62 |
| 47.                                                         | versuchte ich zunächst innerlich einen Schritt zurück zu treten um die Dinge aus etwas größerer Distanz objektiver zu beurteilen.                | 1.37 (1.04) | 0.70 |
| 49.                                                         | habe ich mich behauptet und für das gekämpft was ich wollte.                                                                                     | 1.81 (1.15) | 0.59 |
| 50.                                                         | habe ich versucht, der Sache auch etwas Positives abzugewinnen.                                                                                  | 1.50 (1.02) | 0.77 |
| 53.                                                         | habe ich mich beruhigt, in dem ich mich mit einem angenehmen Duft umgeben habe.                                                                  | 1.03 (1.14) | 0.51 |
| 54.                                                         | habe ich verhandelt oder einen Kompromiss geschlossen, um der Situation etwas Positives abzugewinnen.                                            | 1.32 (0.95) | 0.67 |
| 55.                                                         | habe ich mit jemandem gesprochen, um die Situation genauer zu verstehen.                                                                         | 2.08 (1.07) | 0.66 |
| 58.                                                         | habe ich mich bemüht, nicht alle Brücken hinter mir abzureißen, sondern mir verschiedene Wege offen zu halten.                                   | 1.70 (1.06) | 0.64 |
| 59.                                                         | habe ich mich auf die positiven Seiten in meinem Leben konzentriert und negativen Gedanken und Gefühlen weniger Beachtung geschenkt.             | 1.28 (1.09) | 0.75 |
| <b>Faktor 2: Allgemeines dysfunktionales Coping (DCS-1)</b> |                                                                                                                                                  |             |      |
| 05.                                                         | habe ich gegessen, Alkohol getrunken oder geraucht um mich besser zu fühlen.                                                                     | 2.35 (1.39) | 0.35 |

|     |                                                                                   |             |      |
|-----|-----------------------------------------------------------------------------------|-------------|------|
| 07. | habe ich mir gewünscht, dass ich rückgängig machen kann, was passiert war.        | 2.74 (1.14) | 0.55 |
| 13. | habe ich anderen verschwiegen, wie schwierig die Situation für mich war.          | 2.65 (1.04) | 0.69 |
| 21. | habe ich mich schlecht gefühlt, weil ich das Problem nicht verhindern konnte.     | 2.93 (0.94) | 0.72 |
| 23. | bin ich anderen aus dem Weg gegangen oder vermied es Leute zu treffen.            | 2.58 (1.14) | 0.62 |
| 25. | habe ich mich geweigert zu glauben, dass es passiert war.                         | 1.48 (1.25) | 0.51 |
| 28. | habe ich mich selbst kritisiert oder mir Vorhaltungen gemacht.                    | 3.14 (0.97) | 0.75 |
| 32. | habe ich meine Gefühle für mich behalten.                                         | 2.57 (0.93) | 0.51 |
| 36. | habe ich mir selbst die Schuld gegeben.                                           | 3.05 (1.13) | 0.81 |
| 40. | habe ich es vermieden, mich mit meinem Problem auseinander zu setzen.             | 2.07 (1.19) | 0.65 |
| 43. | habe ich mir gewünscht, eine stärkere und optimistischere Person zu sein.         | 3.06 (1.03) | 0.47 |
| 48. | habe ich mir gewünscht, dass ich die Art, wie ich fühle ändern könnte.            | 3.11 (0.99) | 0.50 |
| 51. | habe ich mir gewünscht, dass die Situation einfach verschwindet oder beendet ist. | 3.11 (0.97) | 0.64 |
| 56. | habe ich so weiter gemacht, als ob nichts passiert wäre.                          | 1.88 (1.25) | 0.51 |

### **Faktor 3: Beschuldigung anderer (DCS-2)**

|     |                                                                                         |             |      |
|-----|-----------------------------------------------------------------------------------------|-------------|------|
| 03. | habe ich überlegt, wer Schuld hatte.                                                    | 2.22 (1.41) | 0.52 |
| 10. | bin ich auf die Menschen oder Dinge wütend geworden, die das Problem verursacht hatten. | 2.48 (1.28) | 0.65 |
| 18. | habe ich gedacht, dass andere sich mir gegenüber unfair verhalten.                      | 2.19 (1.13) | 0.87 |
| 33. | habe ich es an anderen ausgelassen.                                                     | 1.61 (1.27) | 0.81 |

|     |                                                       |             |      |
|-----|-------------------------------------------------------|-------------|------|
| 38. | habe ich die Verantwortung dafür bei anderen gesucht. | 1.37 (1.17) | 0.50 |
| 52. | habe ich andere Menschen beschuldigt.                 | 1.49 (1.27) | 0.76 |

*Anmerkungen:* Nr. = Itemnummer in der deutschsprachigen Version; FL = Faktorladung. DBT = Dialektisch-Behaviorale Therapie; DSS = Subskala DBT-Skillsskala; DCS = Dysfunctional Coping Subscale.
